# Supplementary material for: Enhanced conductivity of (110)-textured ScSZ films tuned by an amorphous alumina interlayer
Source: Royal Society of Chemistry journal article supplement (doi:10.1039/c5cp03631c), 2015-01-01
Supplement: c5cp03631c1.pdf [file c5cp03631c1.pdf]

## **Enhanced conductivity in (110)-textured ScSZ films tuned by amorphous alumina interlayer**

*Lei Yao,<sup>a</sup> Gang Ou,<sup>a</sup> Hiroki Nishijima<sup>b</sup> and Wei Pan<sup>a\*</sup>*

<sup>a</sup>State Key Laboratory of New Ceramics and Fine Processing, School of Materials Science and Engineering, Tsinghua University, Beijing, 100084, PR China

<sup>b</sup>Functional Material Department, Material Development Division, Toyota Motor Corporation, Toyota, Aichi 471-8572, Japan

## Supporting information

**Table S1** Texture coefficient values calculated using Harrish equation from  $\theta$ - $2\theta$  XRD patterns for 10ScSZ and AO/10ScSZ films

|                           | as-deposited | 600 °C | 800 °C | 1000 °C |
|---------------------------|--------------|--------|--------|---------|
| 10ScSZ ( $f_{(111)}$ )    | 2.87         | 2.89   | 2.68   | 2.01    |
| 10ScSZ ( $f_{(110)}$ )    | 0.20         | 0.23   | 0.54   | 1.44    |
| AO/10ScSZ ( $f_{(110)}$ ) | 1.52         | 1.56   | 1.84   | 1.91    |

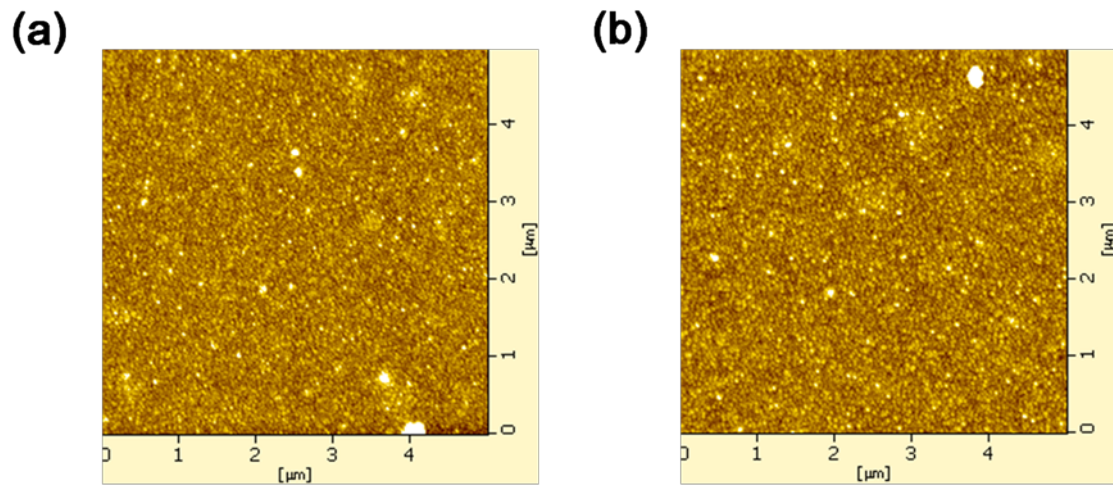

**Fig. S1** Typical AFM images of the (a) AO/10ScSZ and (b) 10ScSZ thin films.

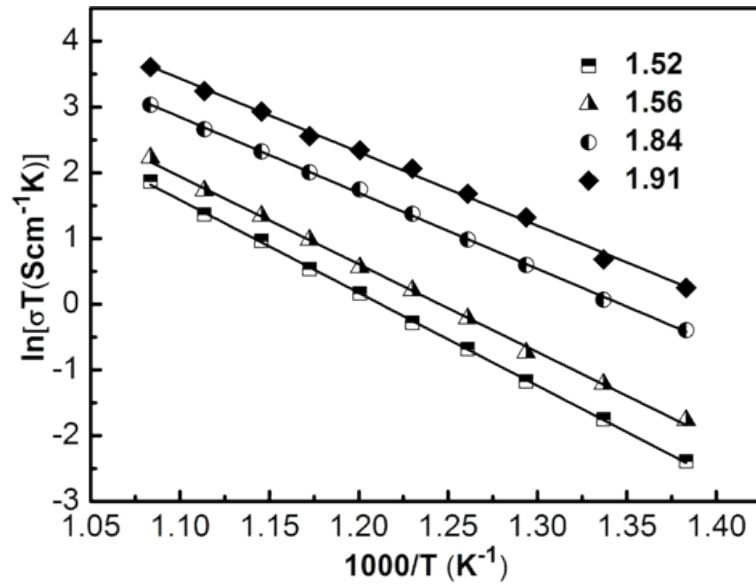

**Fig. S2** Arrhenius plots of AO/10ScSZ thin films with different  $f_{(110)}$  values.
